# Supplementary material for: Implementing SARS-CoV-2 Rapid Antigen Testing in the Emergency Ward of a Swiss University Hospital: The INCREASE Study
Source: PubMed Central journal article supplement (PMC8069749; doi:10.3390/microorganisms9040798), 2021-04-10
Supplement: microorganisms-09-00798-s001.pdf [file microorganisms-09-00798-s001.pdf]

Figure S1: Passing-Bablok regressions for cobas 6800<sup>®</sup> Ct gene E against: A. GeneXpert<sup>®</sup> gene E (for Ct >20); B. GeneXpert<sup>®</sup> gene E (for Ct <20); C. BD-MAX<sup>™</sup> gene N2.

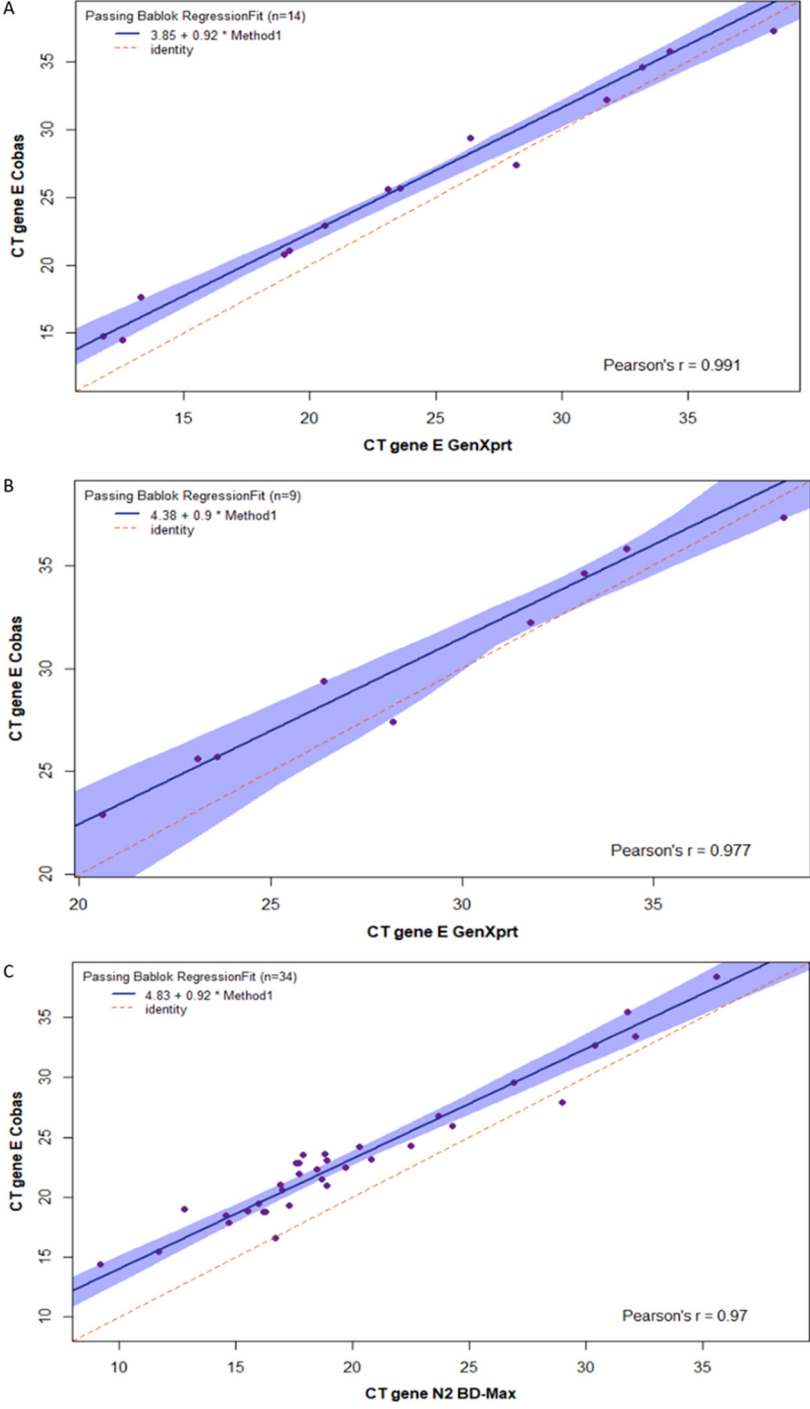

Method 1: Ct gene E cobas6800<sup>®</sup>

Figure S2: Changes of SARS-CoV-2 viral load over time among patients admitted between January and June 2020 according to symptoms delay.

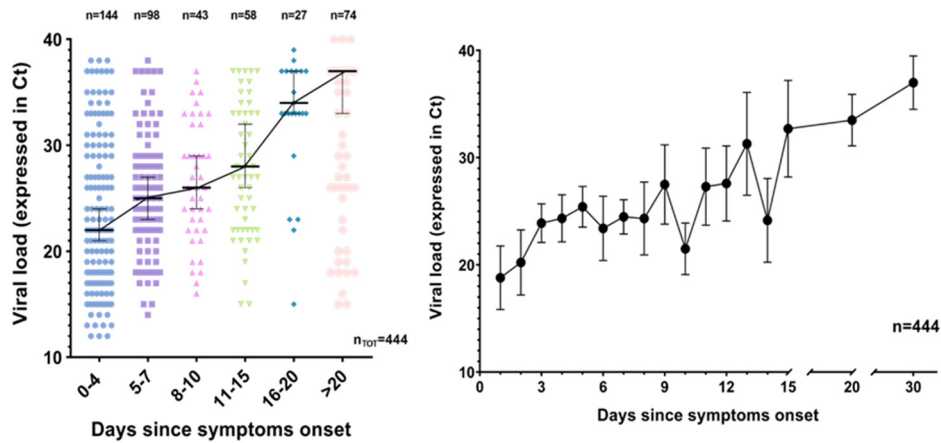

Table S1: Bland-Altman analyses for inter-variability of Ct measure between cobas 6800® (Roche) versus GeneXpert® (Cepheid) or BD-Max™ (Becton, Dickinson).

|                                     | Proportional bias<br>[95% CI] | Upper LoA<br>[95% CI] | Lower LoA<br>[95% CI] | <i>p</i> -value |
|-------------------------------------|-------------------------------|-----------------------|-----------------------|-----------------|
| Overall cobas vs GeneXpert (n=14)   | -1.7<br>[-2.5;-0.9]           | 1.1<br>[-0.3;2.6]     | -4.5<br>[-6.1;-3.0]   | <0.001          |
| Cobas vs GeneXpert for Ct >20 (n=9) | -1.2<br>[-2.4;-0.1]           | 1.6<br>[-2.5;-0.9]    | -4.1<br>[-6.1;-3.1]   | 0.03            |
| Overall cobas vs BD-MAX (n=34)      | -3.2<br>[-3.7;-2.7]           | -0.2<br>[-1.1;0.7]    | -6.2<br>[-7.1;-5.3]   | <0.001          |

Table S2: RAT sensitivity rates after stratification for viral load.

| RAT        | Sensitivity among patients with VL>10 <sup>5</sup> (n=71) | Sensitivity among patients with VL>10 <sup>6</sup> (n=46) | Sensitivity among patients with VL>10 <sup>7</sup> (n=38) |
|------------|-----------------------------------------------------------|-----------------------------------------------------------|-----------------------------------------------------------|
| Exdia      | 74.6%                                                     | 100%                                                      | 100%                                                      |
| Standard Q | 66.2%                                                     | 97.8%                                                     | 100%                                                      |
| Panbio     | 66.2%                                                     | 96.6%                                                     | 100%                                                      |
| BD Veritor | 64.8%                                                     | 95.6%                                                     | 100%                                                      |
